# Supplementary material for: Role of the electronically-active amorphous state in low-temperature processed In2O3 thin-film transistors
Source: Royal Society of Chemistry journal article supplement (doi:10.1039/d0ma00072h), 2020-01-01
Supplement: d0ma00072h1.pdf [file d0ma00072h1.pdf]

## Supplementary Information

### Role of the electronically-active amorphous state in low-temperature processed $\text{In}_2\text{O}_3$ thin-film transistors

*Ahmad R. Kirmani<sup>1,§</sup>, Emily F. Roe<sup>1,§</sup>, Christopher M. Stafford<sup>1</sup>, Lee J. Richter<sup>1</sup>*

<sup>1</sup>Materials Science and Engineering Division, National Institute of Standards and Technology (NIST), Gaithersburg, MD, 20899 USA

<sup>§</sup>Guest Researcher

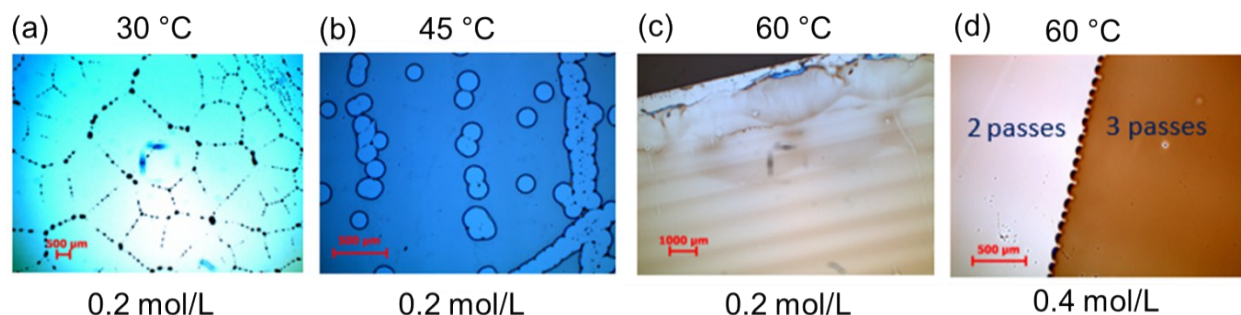

**Figure S1.** Optical micrographs of sg- $\text{In}_2\text{O}_3$  blade-coated films at various substrate temperatures. (d) corresponds to the optimized coating conditions and shows the film after 2 and 3 coats (with 250 °C annealing after each coat).

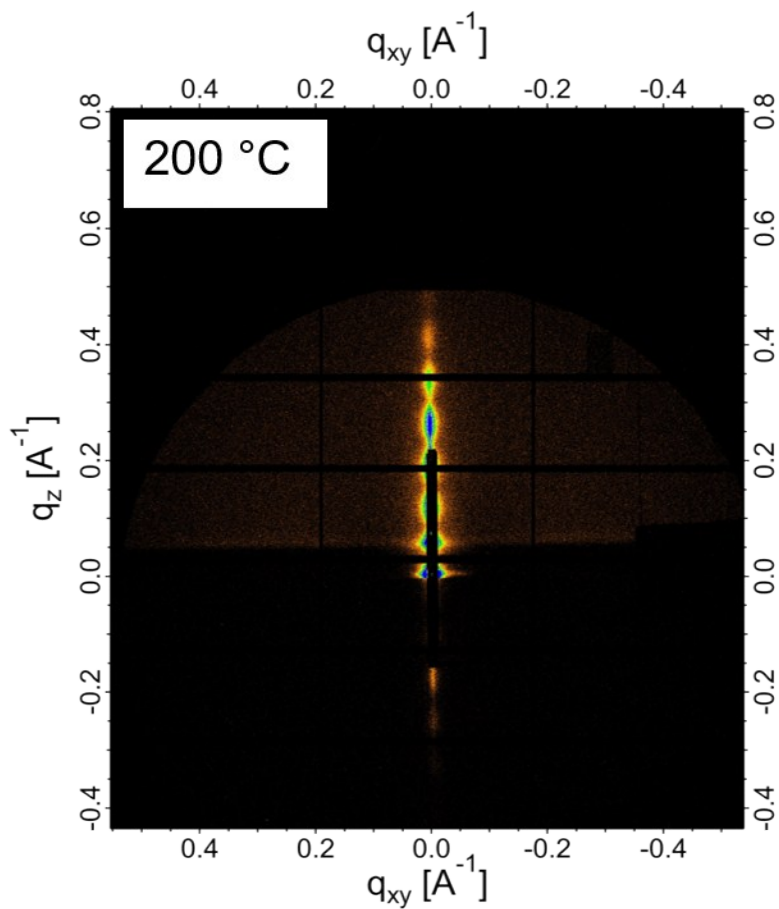

**Figure S2.** Grazing-incidence small-angle X-ray scattering (GISAXS) pattern of a representative 200 °C annealed bladed sg-In<sub>2</sub>O<sub>3</sub> film. Periodic modulation of intensity seen along  $q_z$  (vertical) is due to the X-ray standing wave that forms inside the thin film and is evidence to the good quality and uniformity of the bladed In<sub>2</sub>O<sub>3</sub> films used in this study.

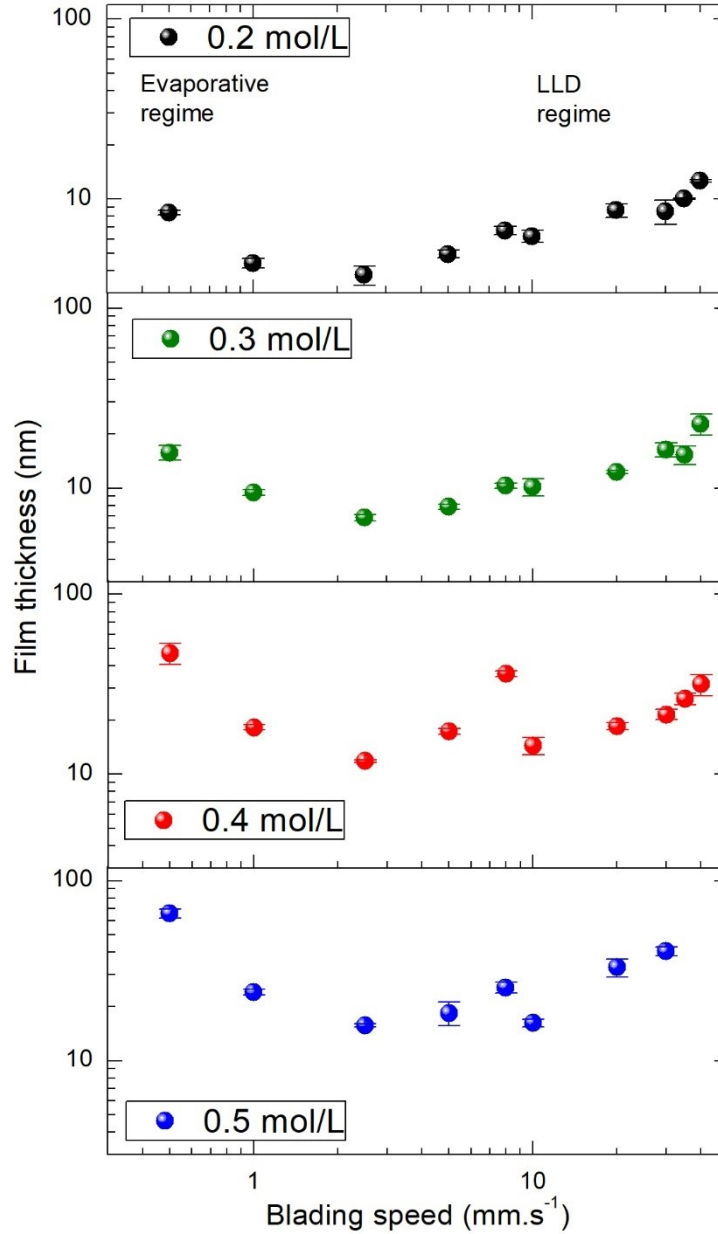

**Figure S3.** Thickness optimization of blade-coated sg-In<sub>2</sub>O<sub>3</sub> films at 60 °C substrate temperature. Evaporative (lower speeds, negative slope) and Landau-Levich-Derjaguin (higher speeds, positive slope) coating regimes are clearly observed and suggest that the optimized films (5 mm s<sup>-1</sup>) are coated in the Landau-Levich-Derjaguin regime. All uncertainties are ± one standard deviation of the mean.

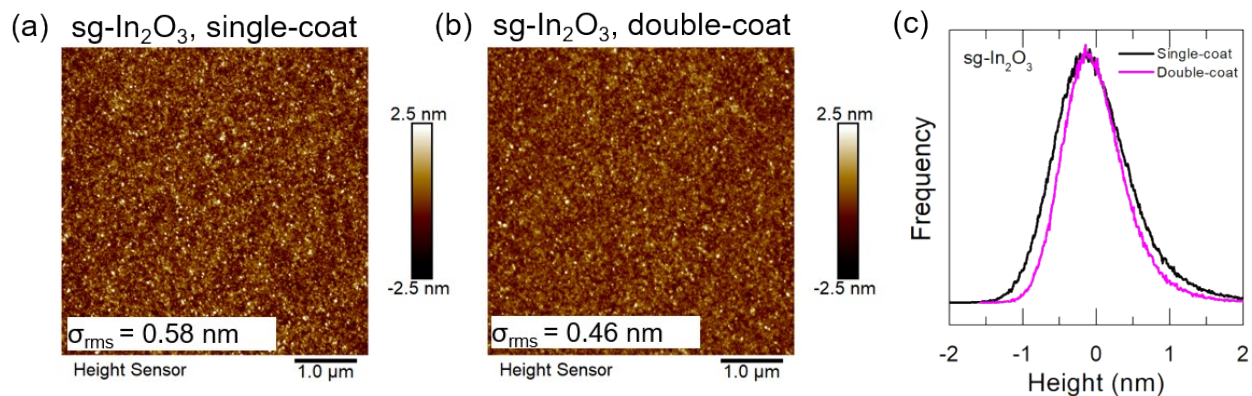

**Figure S4.** Atomic force microscopy (AFM) images showing the surface morphology of (a) single-coat (b) double-coat  $\text{sg-In}_2\text{O}_3$  films, annealed at  $325 \text{ }^\circ\text{C}$ . (c) Height histogram from the two images showing a slightly narrower surface roughness distribution for the double-coat film (pink).

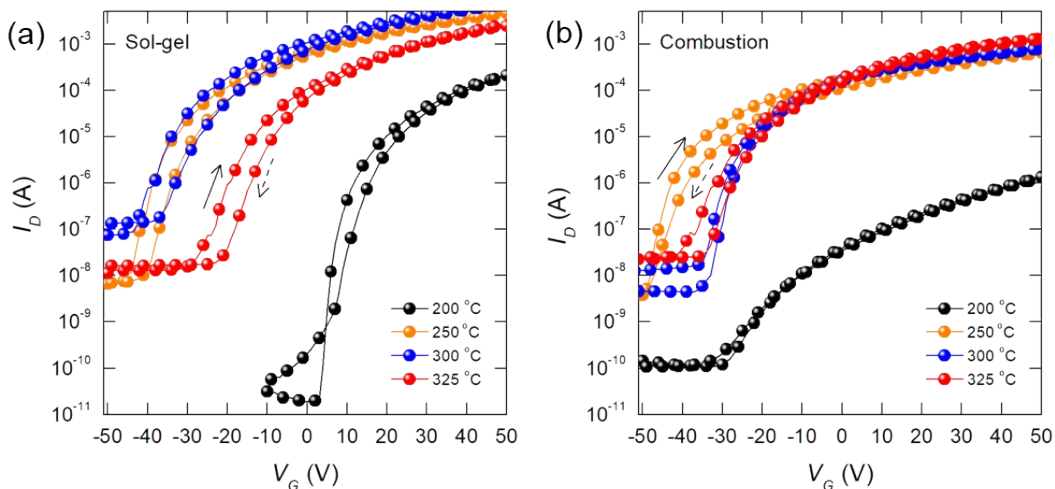

**Figure S5.** Forward and reverse sweeps of a few representative devices for (a)  $\text{sg-}$  and (b)  $\text{c-In}_2\text{O}_3$  TFTs. Solid black arrow denotes forward sweep, while dashed black arrow denotes reverse sweep.

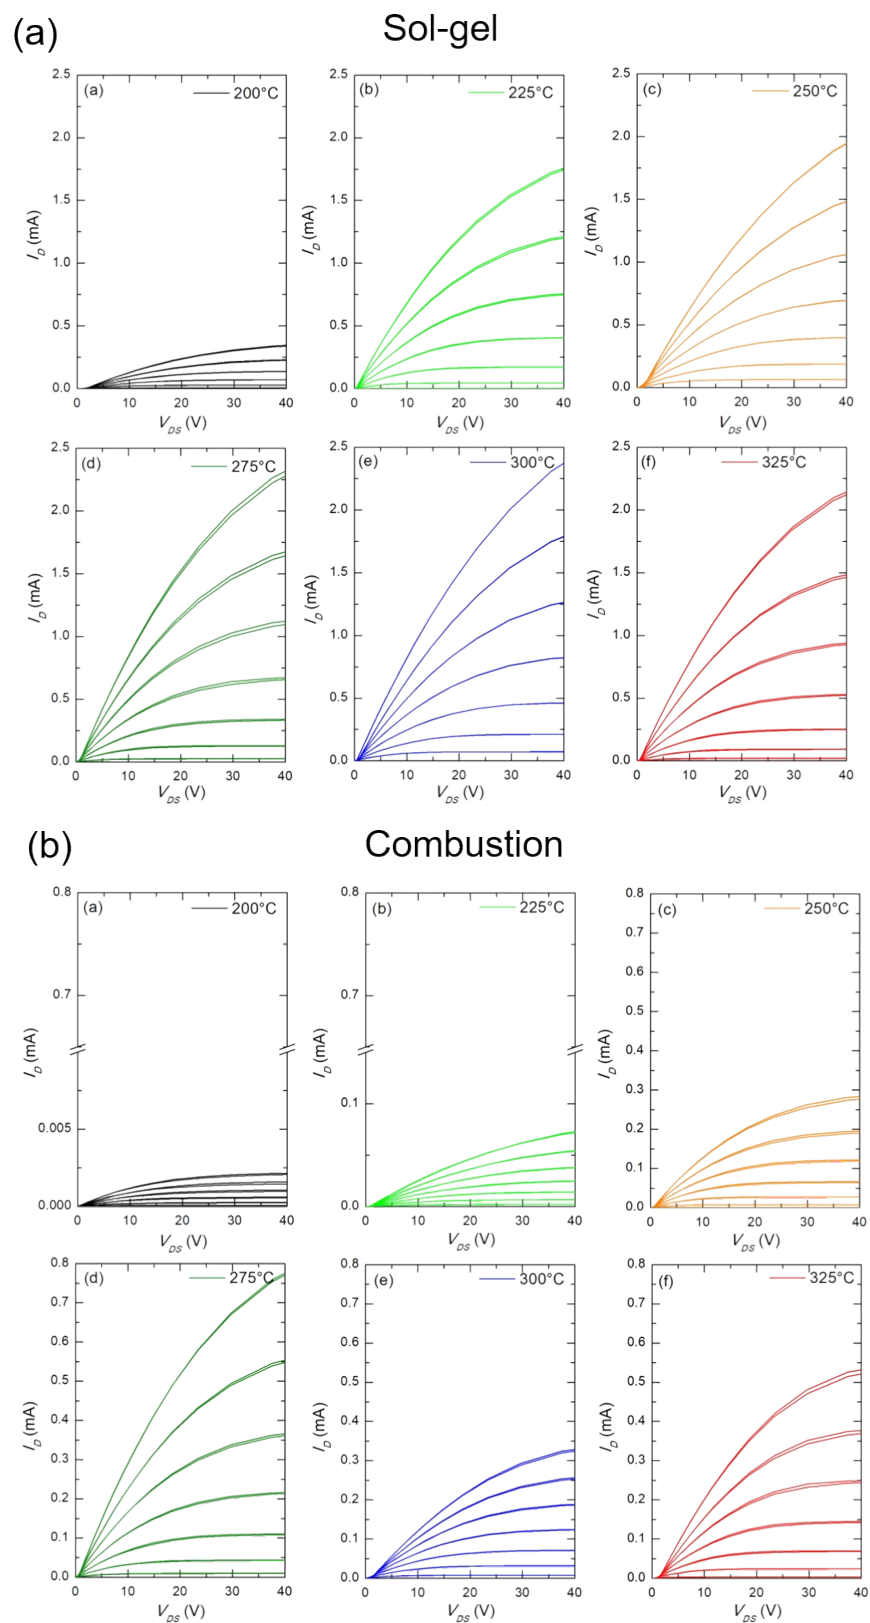

**Figure S6.** Representative output curves for (a). sg- and (b). c- $\text{In}_2\text{O}_3$  TFTs for all the annealing conditions considered in this study.  $V_{GS} = 0$  V to 60 V, step = 10 V

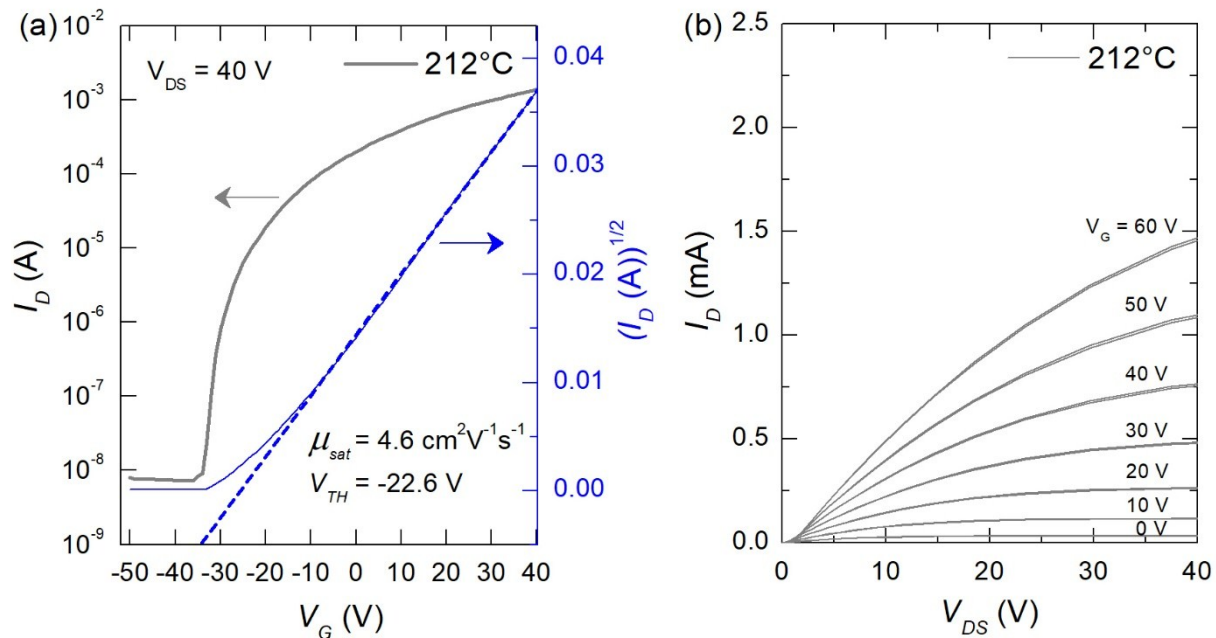

**Figure S7.** (a) Transfer, and (b) output curves for the best-performing 212 °C annealed sg-In<sub>2</sub>O<sub>3</sub> TFT. Transfer curve was measured at a  $V_{DS} = 40$  V, while output curves were measured in the range of  $V_{GS} = 0$  V to 60 V with a step = 10 V.

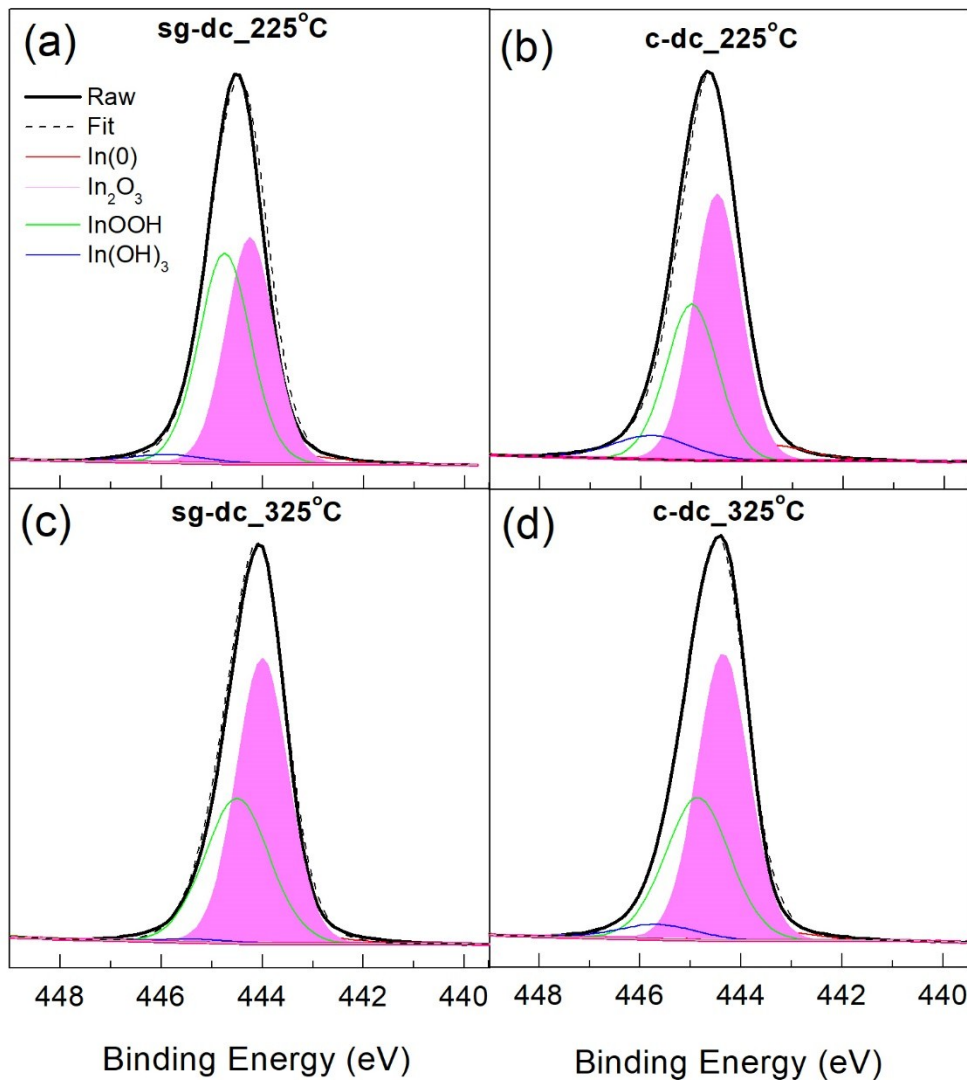

**Figure S8.** High-resolution X-ray photoelectron spectroscopy (XPS) spectra of the In  $3d_{5/2}$  core level peaks. Pink component is the M-O-M lattice content. dc = double-coat (16 nm)

**Table S1.** Relative concentration of the various components of In  $3d_{5/2}$  core level peak. dc = double-coat (16 nm)

| Sample    | M(0) | M-O-M | M-OH | M-OR |
|-----------|------|-------|------|------|
| sg_dc_225 | 2.8  | 46.9  | 47.7 | 2.7  |
| sg_dc_325 | 2.3  | 59.1  | 37.6 | 1.0  |
| c_dc_225  | 5.5  | 52.9  | 33.9 | 7.7  |
| c_dc_325  | 3.0  | 57.0  | 35.5 | 4.5  |

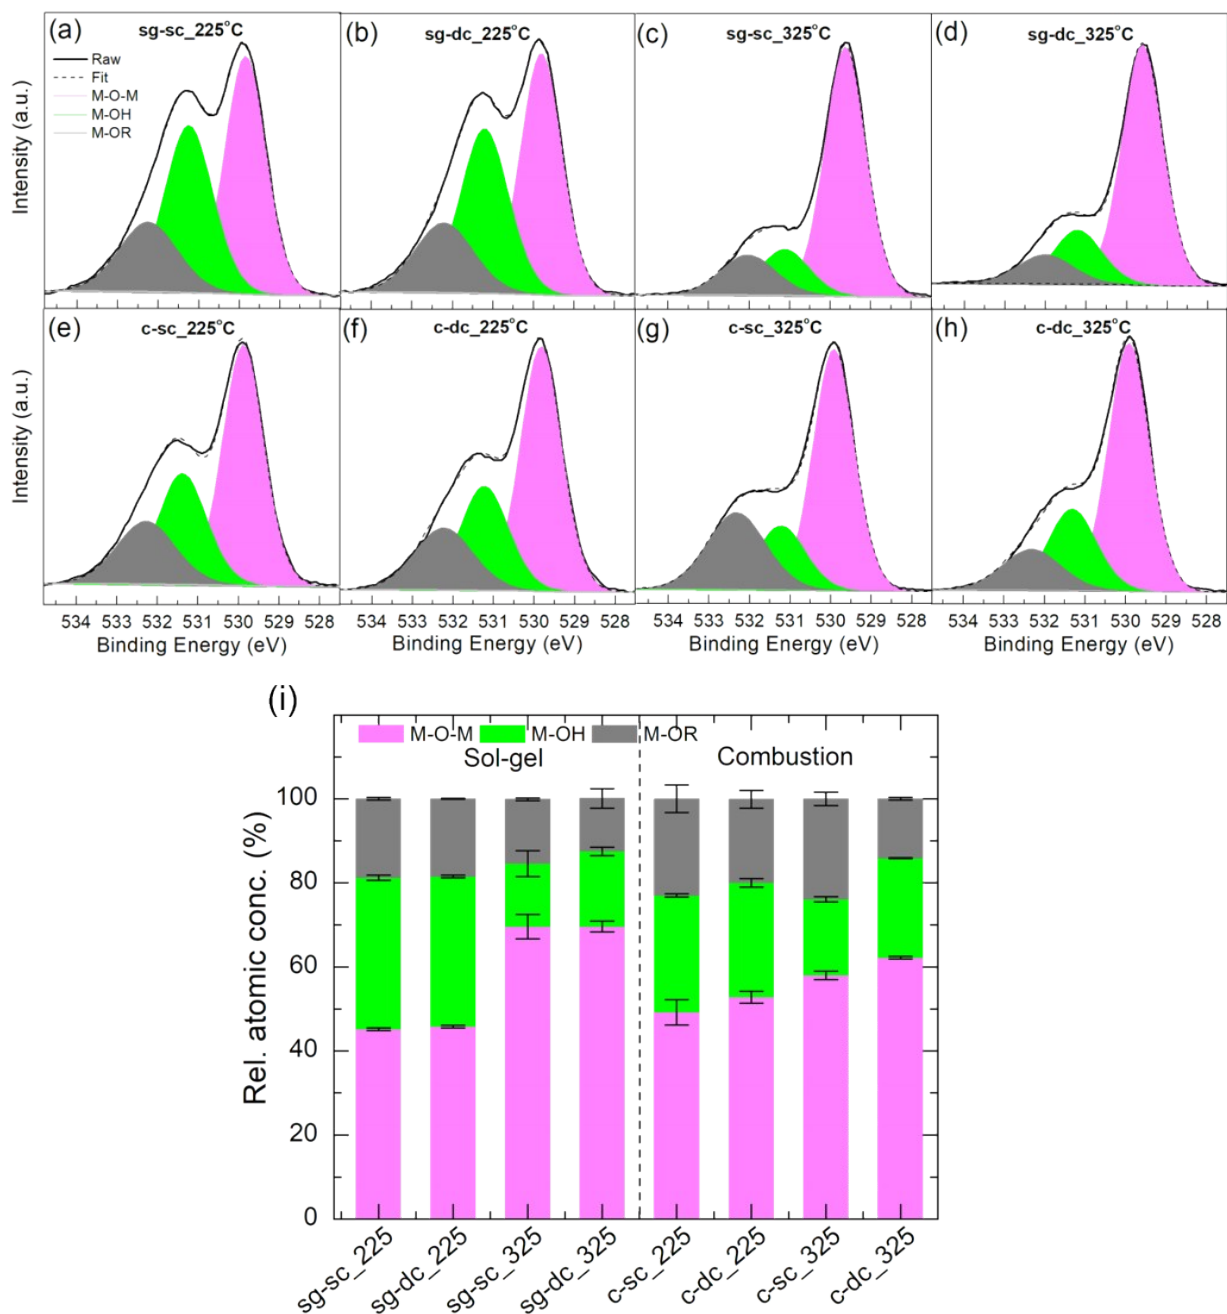

**Figure S9.** XPS data for O1s core level peak for the 8 nm single-coat (sc) films. For comparison, corresponding data on 16 nm double-coat (dc) is also shown. (i). Relative concentration of M-O-M, M-OH and M-OR components of the O1s peak. Error bars represent one standard deviation of the mean. sc = single-coat (8 nm), dc = double-coat (16 nm)



**Table S2.** M-O-M, M-OH and M-OR components (%) of the O1s core level for the different samples. sc = single-coat (8 nm), dc = double-coat (16 nm).  $\pm$  represents one population standard deviation.

| Sample    | M-O-M          | M-OH           | M-OR           |
|-----------|----------------|----------------|----------------|
| sg-sc_225 | 45.2 $\pm$ 0.3 | 36.0 $\pm$ 0.6 | 18.8 $\pm$ 0.3 |
| sg-dc_225 | 45.8 $\pm$ 0.3 | 35.7 $\pm$ 0.3 | 18.5 $\pm$ 0.1 |
| sg-sc_325 | 69.6 $\pm$ 2.9 | 15.0 $\pm$ 3.1 | 15.3 $\pm$ 0.3 |
| sg-dc_325 | 69.6 $\pm$ 1.3 | 17.9 $\pm$ 1.0 | 12.6 $\pm$ 2.3 |
| c-sc_225  | 49.2 $\pm$ 3.0 | 27.8 $\pm$ 0.4 | 23.0 $\pm$ 3.3 |
| c-dc_225  | 52.8 $\pm$ 1.4 | 27.2 $\pm$ 1.0 | 19.9 $\pm$ 2.1 |
| c-sc_325  | 58.0 $\pm$ 1.0 | 18.1 $\pm$ 0.6 | 23.9 $\pm$ 1.6 |
| c-dc_325  | 62.2 $\pm$ 0.3 | 23.7 $\pm$ 0.1 | 14.1 $\pm$ 0.3 |

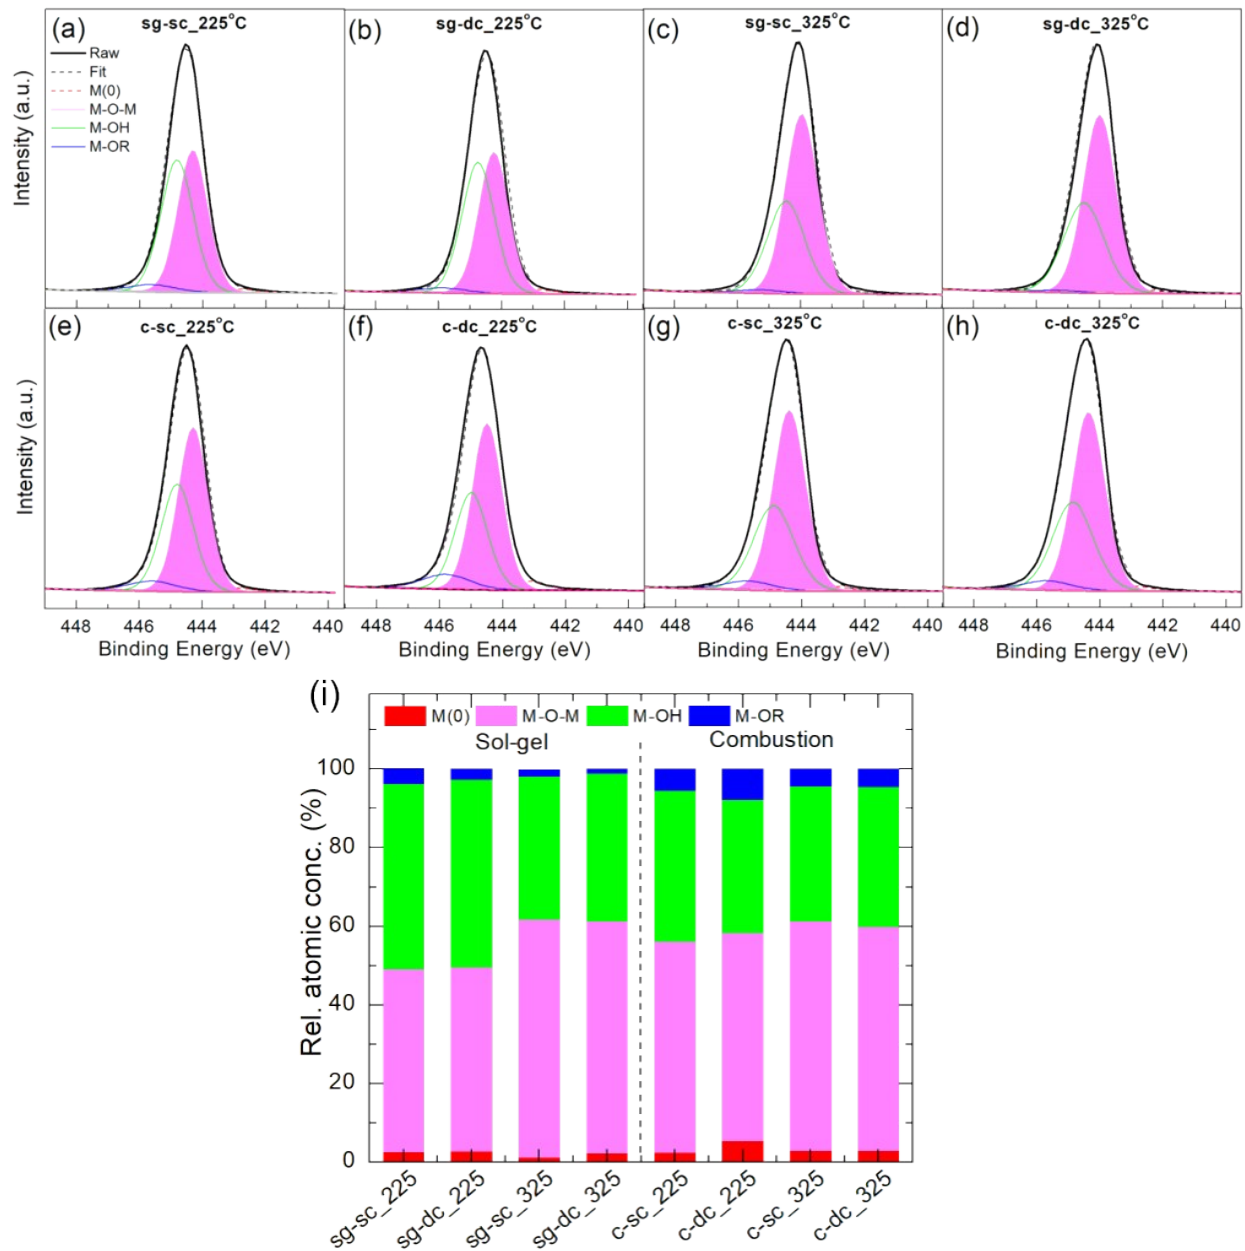

**Figure S10.** XPS data for In 3d<sub>5/2</sub> core level peak for the 8 nm single-coat (sc) films. For comparison, corresponding data on 16 nm double-coat (dc) is also shown. (i). Relative concentration of the various components of In 3d<sub>5/2</sub> peak. sc = single-coat (8 nm), dc = double-coat (16 nm)

**Table S3.** M(0), M-O-M, M-OH and M-OR components (%) of the In 3d<sub>5/2</sub> core level for the different samples. sc = single-coat (8 nm), dc = double-coat (16 nm)

| Sample    | M(0) | M-O-M | M-OH | M-OR |
|-----------|------|-------|------|------|
| sg-sc_225 | 2.7  | 46.4  | 47.2 | 3.9  |
| sg-dc_225 | 2.8  | 46.9  | 47.7 | 2.7  |
| sg-sc_325 | 1.3  | 60.5  | 36.4 | 1.7  |
| sg-dc_325 | 2.3  | 59.1  | 37.6 | 1.0  |
| c-sc_225  | 2.5  | 53.7  | 38.4 | 5.4  |
| c-dc_225  | 5.5  | 52.9  | 33.9 | 7.7  |
| c-sc_325  | 3.0  | 58.3  | 34.4 | 4.3  |
| c-dc_325  | 3.0  | 57.0  | 35.5 | 4.5  |

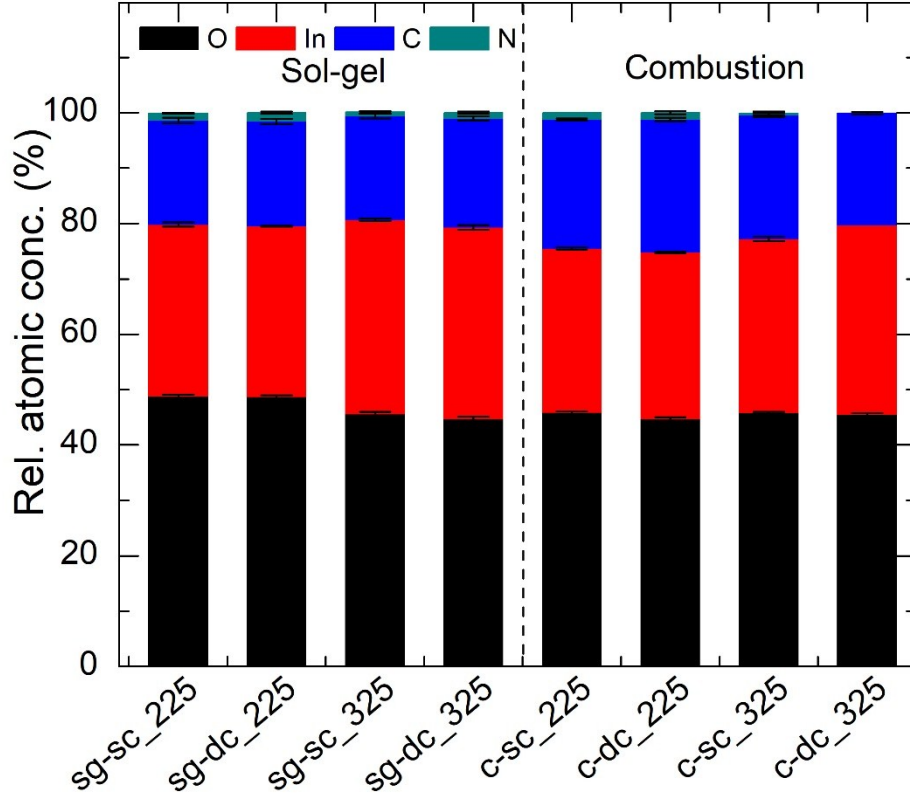

**Figure S11.** Relative atomic concentration of O, In, C and N for all the different In<sub>2</sub>O<sub>3</sub> films considered in this study. sc = single-coat (8 nm), dc = double-coat (16 nm). Error bars represent one standard deviation of the mean.

**Table S4.** Relative atomic concentrations (%) for O, In, C and N for the different samples. Each value represents an average over 3 spots. sc = single-coat (8 nm), dc = double-coat (16 nm). ± represents one population standard deviation.

| Sample    | O          | In         | C          | N         |
|-----------|------------|------------|------------|-----------|
| sg-sc_225 | 48.8 ± 0.3 | 31.0 ± 0.4 | 18.8 ± 0.5 | 1.3 ± 0.1 |
| sg-dc_225 | 48.7 ± 0.3 | 30.8 ± 0.1 | 18.9 ± 0.5 | 1.6 ± 0.2 |
| sg-sc_325 | 45.6 ± 0.4 | 35.1 ± 0.2 | 18.7 ± 0.4 | 0.7 ± 0.2 |
| sg-dc_325 | 44.7 ± 0.4 | 34.6 ± 0.4 | 19.7 ± 0.4 | 1.0 ± 0.2 |
| c-sc_225  | 45.9 ± 0.2 | 29.6 ± 0.2 | 23.3 ± 0.2 | 1.2 ± 0.0 |
| c-dc_225  | 44.7 ± 0.3 | 30.1 ± 0.1 | 24.0 ± 0.3 | 1.2 ± 0.3 |
| c-sc_325  | 45.8 ± 0.2 | 31.4 ± 0.4 | 22.4 ± 0.4 | 0.3 ± 0.3 |
| c-dc_325  | 45.5 ± 0.3 | 34.2 ± 0.0 | 20.2 ± 0.2 | 0.0 ± 0.0 |
